# Supplementary material
Source: PubMed Central journal article supplement (PMC4373738)

## Supplemental Figure Legend

**Figure 1. Detection of PCSK9 protein levels in liver homogenates.** Equal amounts of homogenate proteins of individual liver samples of Ad-shHNF1 $\alpha$  and Ad-shLacZ infected mice were resolved by SDS-PAGE. PCSK9 protein was detected by immunoblotting using anti-PCSK9 antibody. The membrane was reprobbed with anti- $\beta$ -actin antibody. Values are the mean  $\pm$  SEM of six samples per group.

# Supplemental Figure I

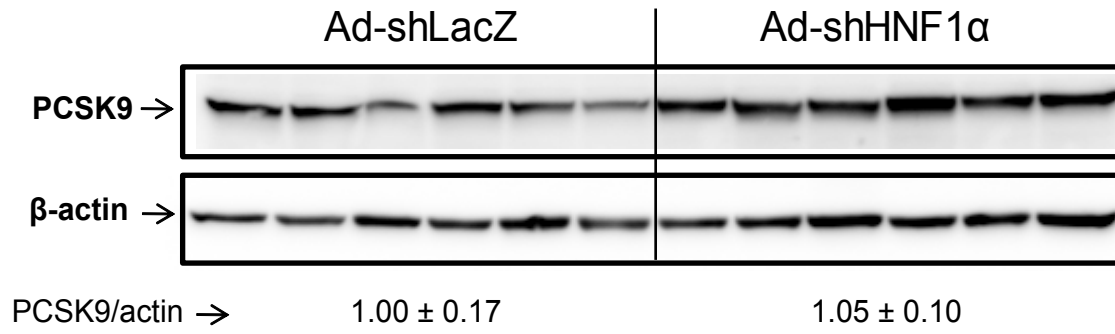

Supplement: supp_M052969_jlr.M052969-1.pdf [file supp_M052969_jlr.M052969-1.pdf]
